# Supplementary material for: Intestinal Health and Threonine Requirement of Growing Pigs Fed Diets Containing High Dietary Fibre and Fermentable Protein
Source: PubMed Central journal article supplement (PMC7694666; doi:10.3390/ani10112055), 2020-11-06
Supplement: animals-10-02055-s001.pdf [file animals-10-02055-s001.pdf]

## Supplementary Material

Title: Intestinal health and threonine requirement of growing pigs fed diets containing fermentable fibre and fermentable protein

Author list: Michael O. Wellington, Rochelle B. Thiessen, Andrew G. Van Kessel, Daniel A Columbus

**Table 1.** Analyzed nutrient content (as-fed basis) of the experimental diets.

|                                    | Dietary Threonine (SID %) <sup>1</sup> |       |       |       |       |
|------------------------------------|----------------------------------------|-------|-------|-------|-------|
|                                    | 0.52                                   | 0.60  | 0.68  | 0.76  | 0.82  |
| Dry matter (%)                     |                                        |       |       |       |       |
| LfCP <sup>1</sup> -LF <sup>2</sup> | 91.74                                  | 91.82 | 91.63 | 91.36 | 91.68 |
| LfCP-HF <sup>3</sup>               | 91.73                                  | 91.73 | 91.81 | 91.75 | 91.72 |
| HfCP <sup>4</sup> -LF              | 91.76                                  | 91.76 | 91.53 | 91.90 | 91.54 |
| HfCP-HF                            | 92.07                                  | 91.83 | 91.93 | 91.84 | 91.44 |
| Crude protein (%)                  |                                        |       |       |       |       |
| LfCP-LF                            | 15.14                                  | 15.43 | 15.36 | 15.15 | 15.30 |
| LfCP-HF                            | 15.99                                  | 15.73 | 15.95 | 16.16 | 16.14 |
| HfCP-LF                            | 17.56                                  | 18.28 | 18.03 | 18.18 | 17.43 |
| HfCP-HF                            | 16.86                                  | 17.38 | 17.73 | 16.75 | 18.13 |
| Total threonine (%)                |                                        |       |       |       |       |
| LfCP-LF                            | 0.59                                   | 0.66  | 0.73  | 0.84  | 0.90  |
| LfCP-HF                            | 0.65                                   | 0.65  | 0.75  | 0.85  | 1.00  |
| HfCP-LF                            | 0.62                                   | 0.70  | 0.76  | 0.82  | 0.97  |
| HfCP-HF                            | 0.64                                   | 0.72  | 0.76  | 0.85  | 0.97  |
| Total lysine (%)                   |                                        |       |       |       |       |
| LfCP-LF                            | 1.31                                   | 1.26  | 1.28  | 1.26  | 1.28  |
| LfCP-HF                            | 1.28                                   | 1.31  | 1.28  | 1.31  | 1.28  |
| HfCP-LF                            | 1.24                                   | 1.23  | 1.23  | 1.23  | 1.23  |
| HfCP-HF                            | 1.26                                   | 1.34  | 1.25  | 1.26  | 1.34  |
| Total methionine (%)               |                                        |       |       |       |       |
| LfCP-LF                            | 0.26                                   | 0.27  | 0.30  | 0.28  | 0.27  |
| LfCP-HF                            | 0.25                                   | 0.22  | 0.36  | 0.36  | 0.28  |
| HfCP-LF                            | 0.27                                   | 0.28  | 0.27  | 0.30  | 0.27  |
| HfCP-HF                            | 0.22                                   | 0.26  | 0.30  | 0.33  | 0.34  |
| Total leucine (%)                  |                                        |       |       |       |       |
| LfCP-LF                            | 1.18                                   | 1.24  | 1.17  | 1.22  | 1.32  |
| LfCP-HF                            | 1.27                                   | 1.21  | 1.22  | 1.26  | 1.27  |
| HfCP-LF                            | 1.27                                   | 1.24  | 1.21  | 1.25  | 1.31  |
| HfCP-HF                            | 1.22                                   | 1.22  | 1.27  | 1.21  | 1.26  |
| Total isoleucine (%)               |                                        |       |       |       |       |
| LfCP-LF                            | 0.61                                   | 0.63  | 0.60  | 0.64  | 0.65  |

|                             |      |      |      |      |      |
|-----------------------------|------|------|------|------|------|
| LfCP-HF                     | 0.66 | 0.61 | 0.61 | 0.65 | 0.66 |
| HfCP-LF                     | 0.65 | 0.60 | 0.60 | 0.63 | 0.64 |
| HfCP-HF                     | 0.60 | 0.60 | 0.67 | 0.60 | 0.68 |
| Total valine (%)            |      |      |      |      |      |
| LfCP-LF                     | 0.78 | 0.77 | 0.79 | 0.81 | 0.79 |
| LfCP-HF                     | 0.76 | 0.79 | 0.81 | 0.84 | 0.80 |
| HfCP-LF                     | 0.80 | 0.75 | 0.76 | 0.77 | 0.78 |
| HfCP-HF                     | 0.78 | 0.79 | 0.78 | 0.78 | 0.81 |
| Insoluble dietary fibre (%) |      |      |      |      |      |
| LfCP-LF                     | 11.8 | 10.9 | 11.0 | 11.2 | 11.5 |
| LfCP-HF                     | 15.7 | 16.4 | 16.0 | 16.3 | 15.0 |
| HfCP-LF                     | 11.1 | 11.4 | 11.4 | 11.6 | 11.6 |
| HfCP-HF                     | 16.7 | 16.9 | 16.2 | 16.4 | 16.4 |
| Soluble dietary fibre (%)   |      |      |      |      |      |
| LfCP-LF                     | 1.4  | 1.2  | 1.7  | 1.7  | 1.5  |
| LfCP-HF                     | 3.4  | 3.2  | 2.6  | 4.0  | 3.9  |
| HfCP-LF                     | 2.1  | 1.8  | 1.9  | 1.6  | 2.2  |
| HfCP-HF                     | 3.4  | 3.1  | 3.1  | 3.3  | 3.3  |
| Total dietary fibre (%)     |      |      |      |      |      |
| LfCP-LF                     | 13.2 | 12.1 | 12.8 | 12.9 | 12.9 |
| LfCP-HF                     | 19.1 | 19.6 | 18.6 | 20.4 | 18.9 |
| HfCP-LF                     | 13.2 | 13.2 | 13.3 | 13.2 | 13.8 |
| HfCP-HF                     | 20.1 | 20.0 | 19.3 | 19.7 | 19.8 |

HF = high-fibre; HfCP = high fermentable crude protein; LF = low fibre; LfCP = low fermentable crude protein; SID = standardized ileal digestible

<sup>1</sup>Calculated total threonine content was 0.63, 0.71, 0.79, 0.87, and 0.93% for the 0.52, 0.60, 0.68, 0.76, and 0.82% SID Thr diets, respectively

**Table S2: Primers used for the quantitative PCR analysis**

| Gene         | Forward [5' to 3']   | Reverse [5' to 3']   | Annealing Temperature, °C | NCBI accession number |
|--------------|----------------------|----------------------|---------------------------|-----------------------|
| RPL19        | AACTCCCGTCAGCAGATCC  | AGTACCCTTCCGCTTACCG  | 60                        | AF_435591             |
| MUC2         | ACCCGCACTACGTCACCTTC | GGCAGGACACCTGGTCATTG | 62                        | BX671371              |
| MUC5AC       | CCCCGTCGAACCAAAGCA   | GGGAGTACATGGAGGCGGT  | 60                        | XM_021082583          |
| GAPDH        | CTTCACGACCATGGAGAAGG | CCAAGCAGTTGGTGGTACAG | 63                        | AF017079              |
| ZO-1         | ACGGCGAAGGTAATTCAGTG | CTTCTCGGTTTGGTGGTCTG | 60                        | XM_003353439.2        |
| IL-10        | CCATGGAAGTGGTCCGCAA  | GCCCAGGTAGCCATGGATC  | 55                        | NW_003535218.1        |
| IL-1 $\beta$ | AGAAGAGCCCATCGTCCTTG | GAGAGCCTTCAGCTCATGTG | 62                        | NM_001005149          |

GAPDH = glyceraldehyde 3-phosphate dehydrogenase; IL-10 = Interleukin-10; IL-1 $\beta$  = Interleukin-1 $\beta$ ; MUC2 = Mucin-2;  
MUC5AC = Mucin 5 (pair 275); RPL19 = ribosomal protein-L19; ZO1; Zonula Occludin -1
